# Supplementary material
Source: PubMed Central journal article supplement (PMC3553382)

Source data from Figure 4D:

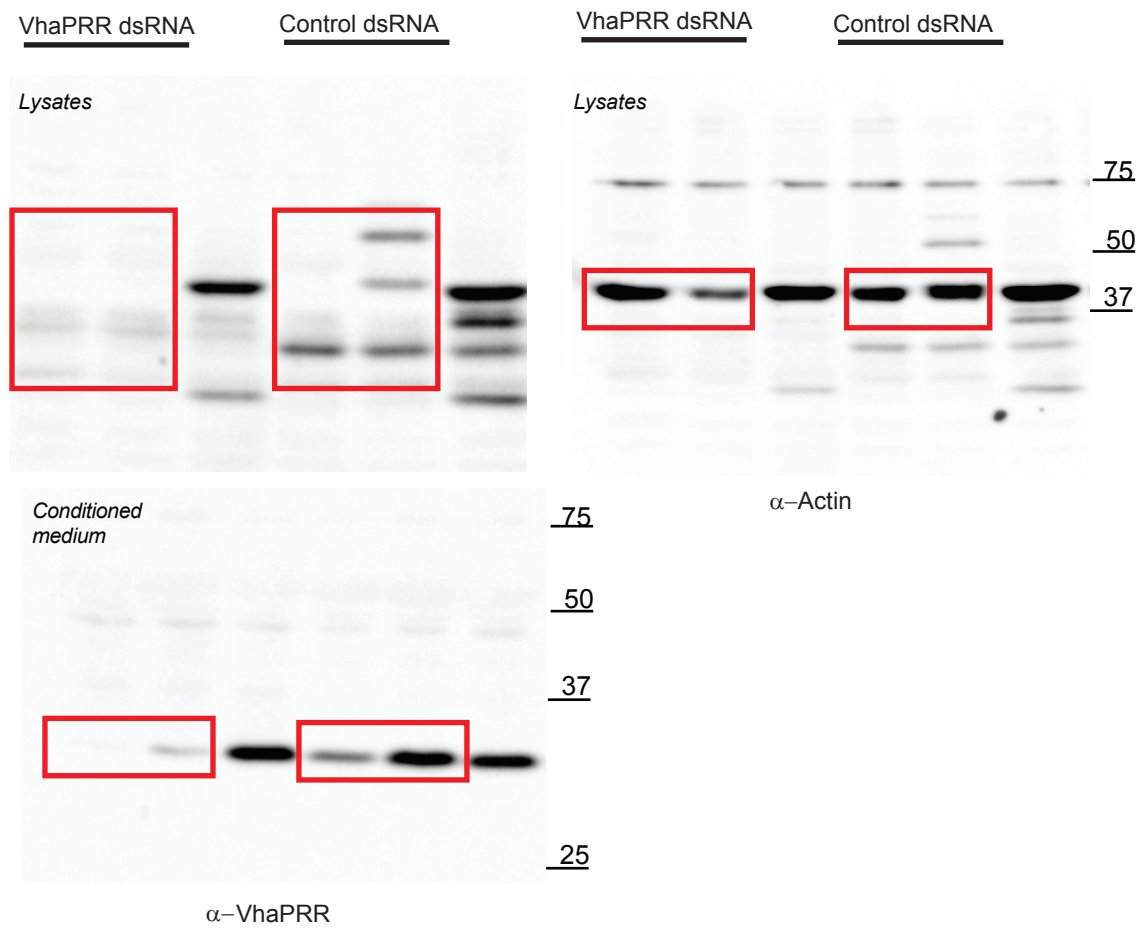

Source data from Figure 4E:

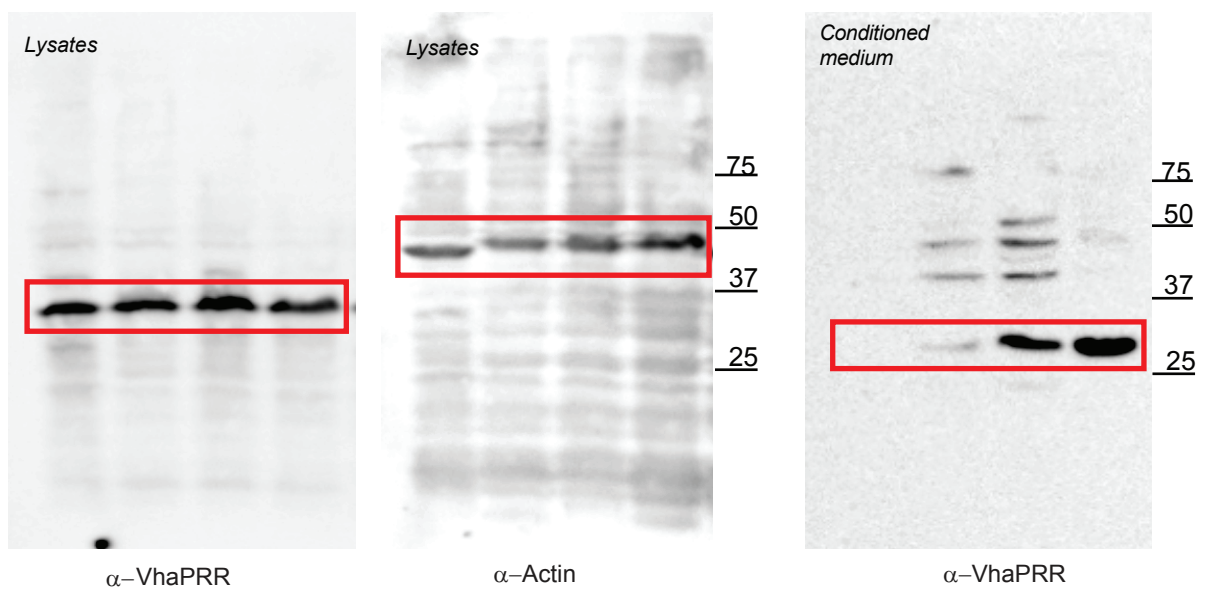

Supplement: emboj2012323df4.pdf [file emboj2012323df4.pdf]

Source data from Figure 5F:

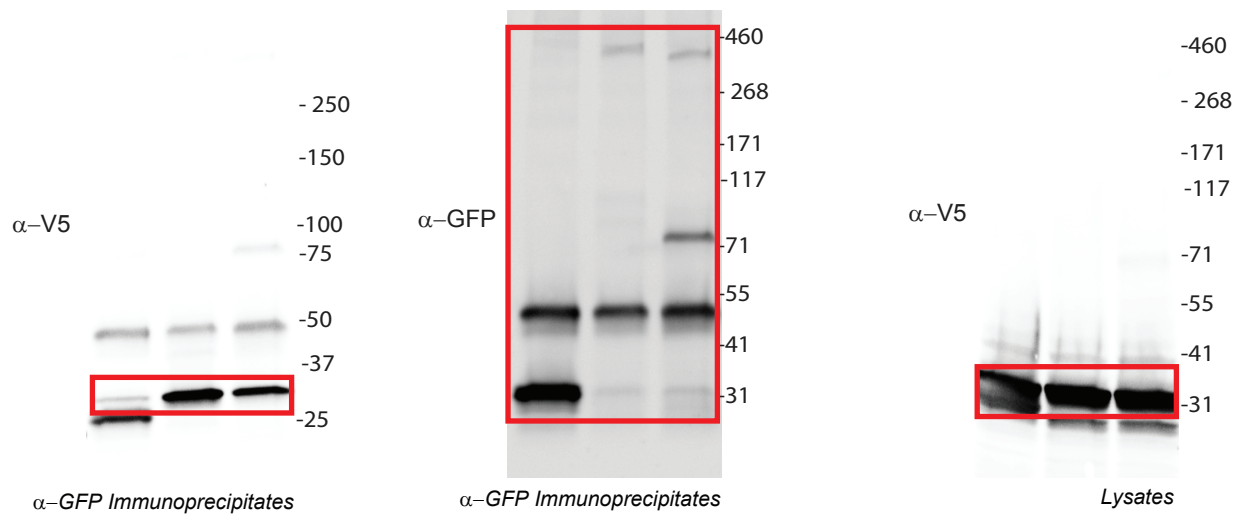

Source data from Figure 5G:

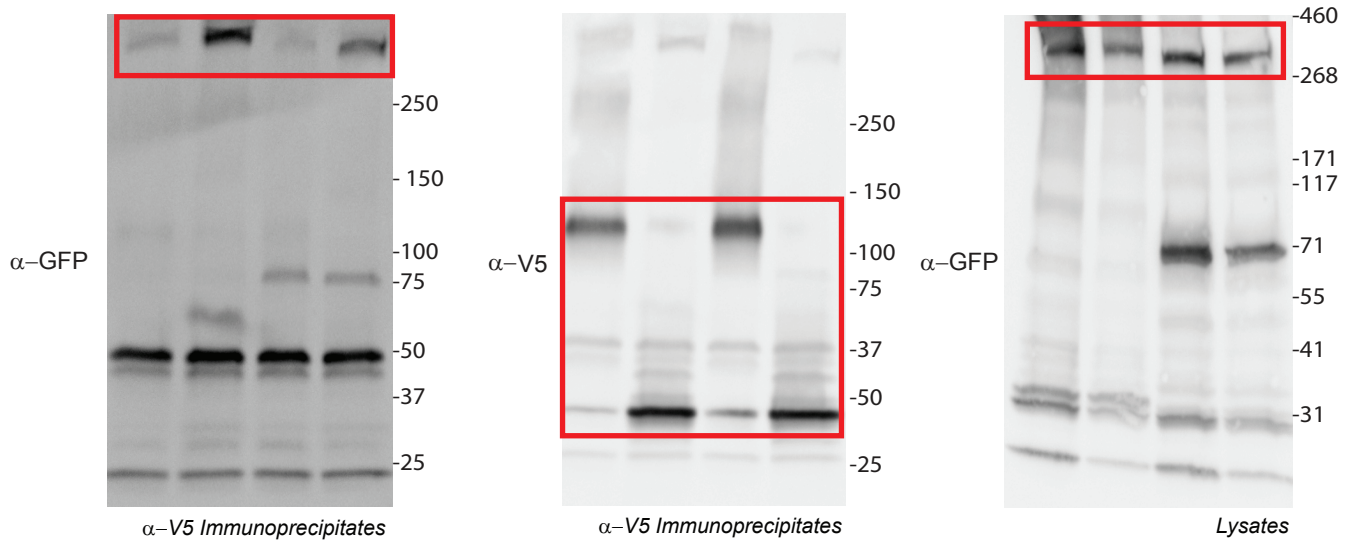

Supplement: emboj2012323df5.pdf [file emboj2012323df5.pdf]
